# Supplementary material for: Arm Circumference-to-Height Ratio as a Situational Alternative to BMI Percentile in Assessing Obesity and Cardiometabolic Risk in Adolescents
Source: PubMed Central journal article supplement (PMC6146674; doi:10.1155/2018/7456461), 2018-09-06
Supplement: 7456461.f1.pdf [file 7456461.f1.pdf]

**Appendix-1: Statistical Measures for Classification of Each Binary Cardiometabolic Risk Variable, Using Each Binary**

**Measure of General Obesity, Reference Table for Females of Ages 12-18 by Race and Ethnicity, N=5,979**

| Race                             | CR                         | Predictor                  | Sensi | Speci | PPV   | NPV   | Tr+ | Fal+ | Tr-  | Fal- | Total  | Accur  | J     |
|----------------------------------|----------------------------|----------------------------|-------|-------|-------|-------|-----|------|------|------|--------|--------|-------|
| Females of All Races/Ethnicities | TC                         | BMI ≥ 85th Percentile      | 42.14 | 64.24 | 38.75 | 67.40 | 796 | 1258 | 2260 | 1093 | 5407   | 56.52% | 6.38  |
|                                  |                            | CR Cutoffs, BMI Percentile | 25.99 | 79.36 | 40.35 | 66.63 | 491 | 726  | 2792 | 1398 | 5407   | 60.72% | 5.36  |
|                                  |                            | CR Cutoffs, Arm/Height     | 24.25 | 80.53 | 40.07 | 66.44 | 458 | 685  | 2833 | 1431 | 5407   | 60.87% | 4.77  |
|                                  | LDL-C                      | BMI ≥ 85th Percentile      | 45.00 | 64.51 | 23.66 | 82.76 | 216 | 697  | 1267 | 264  | 2444   | 60.68% | 9.51  |
|                                  |                            | CR Cutoffs, BMI Percentile | 27.71 | 79.38 | 24.72 | 81.79 | 133 | 405  | 1559 | 347  | 2444   | 69.23% | 7.09  |
|                                  |                            | CR Cutoffs, Arm/Height     | 24.79 | 80.45 | 23.66 | 81.40 | 119 | 384  | 1580 | 361  | 2444   | 69.52% | 5.24  |
|                                  | HDL-C                      | BMI ≥ 85th Percentile      | 57.50 | 69.46 | 41.82 | 81.06 | 859 | 1195 | 2718 | 635  | 5407   | 66.15% | 26.96 |
|                                  |                            | CR Cutoffs, BMI Percentile | 39.69 | 84.05 | 48.73 | 78.50 | 593 | 624  | 3289 | 901  | 5407   | 71.80% | 23.75 |
|                                  |                            | CR Cutoffs, Arm/Height     | 36.88 | 84.87 | 48.21 | 77.88 | 551 | 592  | 3321 | 943  | 5407   | 71.61% | 21.75 |
|                                  | TG                         | BMI ≥ 85th Percentile      | 51.46 | 68.70 | 41.17 | 76.88 | 387 | 553  | 1214 | 365  | 2519   | 63.56% | 20.17 |
|                                  |                            | CR Cutoffs, BMI Percentile | 34.31 | 83.31 | 46.65 | 74.87 | 258 | 295  | 1472 | 494  | 2519   | 68.68% | 17.61 |
|                                  |                            | CR Cutoffs, Arm/Height     | 30.98 | 83.98 | 45.16 | 74.09 | 233 | 283  | 1484 | 519  | 2519   | 68.16% | 14.97 |
|                                  | SBP                        | BMI ≥ 85th Percentile      | 64.48 | 64.87 | 13.93 | 95.40 | 305 | 1885 | 3481 | 168  | 5839   | 64.84% | 29.35 |
|                                  |                            | CR Cutoffs, BMI Percentile | 45.88 | 79.78 | 16.67 | 94.36 | 217 | 1085 | 4281 | 256  | 5839   | 77.03% | 25.66 |
|                                  |                            | CR Cutoffs, Arm/Height     | 44.19 | 81.05 | 17.05 | 94.28 | 209 | 1017 | 4349 | 264  | 5839   | 78.06% | 25.23 |
|                                  | DBP                        | BMI ≥ 85th Percentile      | 43.60 | 62.73 | 3.44  | 97.34 | 75  | 2108 | 3548 | 97   | 5828   | 62.17% | 6.33  |
|                                  |                            | CR Cutoffs, BMI Percentile | 29.07 | 77.92 | 3.85  | 97.31 | 50  | 1249 | 4407 | 122  | 5828   | 76.48% | 6.99  |
|                                  |                            | CR Cutoffs, Arm/Height     | 27.91 | 79.26 | 3.93  | 97.31 | 48  | 1173 | 4483 | 124  | 5828   | 77.75% | 7.17  |
|                                  | HbA1C                      | BMI ≥ 85th Percentile      | 63.38 | 63.25 | 6.51  | 97.71 | 135 | 1938 | 3335 | 78   | 5486   | 63.25% | 26.63 |
|                                  |                            | CR Cutoffs, BMI Percentile | 46.01 | 78.55 | 7.97  | 97.30 | 98  | 1131 | 4142 | 115  | 5486   | 77.29% | 24.56 |
|                                  |                            | CR Cutoffs, Arm/Height     | 44.13 | 79.90 | 8.15  | 97.25 | 94  | 1060 | 4213 | 119  | 5486   | 78.51% | 24.03 |
| FPG                              | BMI ≥ 85th Percentile      | 46.99                      | 64.15 | 13.21 | 91.24 | 125   | 821 | 1469 | 141  | 2556 | 62.36% | 11.14  |       |
|                                  | CR Cutoffs, BMI Percentile | 33.46                      | 79.65 | 16.04 | 91.15 | 89    | 466 | 1824 | 177  | 2556 | 74.84% | 13.11  |       |
|                                  | CR Cutoffs, Arm/Height     | 30.83                      | 80.92 | 15.80 | 90.97 | 82    | 437 | 1853 | 184  | 2556 | 75.70% | 11.74  |       |
| Non-Hispanic White Females       | Overall                    | BMI ≥ 85th Percentile      | 31.54 | 81.19 | 76.70 | 37.66 | 135 | 41   | 177  | 293  | 646    | 48.30% | 12.73 |
|                                  |                            | CR Cutoffs, BMI Percentile | 19.16 | 91.28 | 81.19 | 36.51 | 82  | 19   | 199  | 346  | 646    | 43.50% | 10.44 |
|                                  |                            | CR Cutoffs, Arm/Height     | 24.07 | 87.16 | 78.63 | 36.89 | 103 | 28   | 190  | 325  | 646    | 45.36% | 11.22 |
|                                  | TC                         | BMI ≥ 85th Percentile      | 36.06 | 72.21 | 41.61 | 67.28 | 181 | 254  | 660  | 321  | 1416   | 59.39% | 8.27  |
|                                  |                            | CR Cutoffs, BMI Percentile | 20.72 | 85.23 | 43.51 | 66.19 | 104 | 135  | 779  | 398  | 1416   | 62.36% | 5.95  |
|                                  |                            | CR Cutoffs, Arm/Height     | 21.31 | 85.23 | 44.21 | 66.35 | 107 | 135  | 779  | 395  | 1416   | 62.57% | 6.54  |
|                                  | LDL-C                      | BMI ≥ 85th Percentile      | 37.50 | 75.66 | 27.12 | 83.37 | 48  | 129  | 401  | 80   | 658    | 68.24% | 13.16 |
|                                  |                            | CR Cutoffs, BMI Percentile | 21.09 | 85.85 | 26.47 | 81.83 | 27  | 75   | 455  | 101  | 658    | 73.25% | 6.94  |
|                                  |                            | CR Cutoffs, Arm/Height     | 19.53 | 85.85 | 25.00 | 81.54 | 25  | 75   | 455  | 103  | 658    | 72.95% | 5.38  |
|                                  | HDL-C                      | BMI ≥ 85th Percentile      | 46.82 | 76.19 | 45.75 | 76.96 | 199 | 236  | 755  | 226  | 1416   | 67.37% | 23.01 |
|                                  |                            | CR Cutoffs, BMI Percentile | 29.18 | 88.40 | 51.88 | 74.43 | 124 | 115  | 876  | 301  | 1416   | 70.62% | 17.57 |
|                                  |                            | CR Cutoffs, Arm/Height     | 28.00 | 87.59 | 49.17 | 73.94 | 119 | 123  | 868  | 306  | 1416   | 69.70% | 15.59 |
|                                  | TG                         | BMI ≥ 85th Percentile      | 37.50 | 78.00 | 45.90 | 71.49 | 84  | 99   | 351  | 140  | 674    | 64.54% | 15.50 |
|                                  |                            | CR Cutoffs, BMI Percentile | 22.77 | 88.00 | 48.57 | 69.60 | 51  | 54   | 396  | 173  | 674    | 66.32% | 10.77 |
|                                  |                            | CR Cutoffs, Arm/Height     | 21.88 | 87.78 | 47.12 | 69.30 | 49  | 55   | 395  | 175  | 674    | 65.88% | 9.65  |
|                                  | SBP                        | BMI ≥ 85th Percentile      | 51.52 | 71.19 | 10.97 | 95.52 | 51  | 414  | 1023 | 48   | 1536   | 69.92% | 22.71 |
|                                  |                            | CR Cutoffs, BMI Percentile | 35.35 | 84.90 | 13.89 | 95.02 | 35  | 217  | 1220 | 64   | 1536   | 81.71% | 20.25 |
|                                  |                            | CR Cutoffs, Arm/Height     | 35.35 | 84.76 | 13.78 | 95.01 | 35  | 219  | 1218 | 64   | 1536   | 81.58% | 20.11 |
|                                  | DBP                        | BMI ≥ 85th Percentile      | 31.37 | 69.84 | 3.46  | 96.73 | 16  | 447  | 1035 | 35   | 1533   | 68.56% | 1.21  |
|                                  |                            | CR Cutoffs, BMI Percentile | 25.49 | 83.94 | 5.18  | 97.04 | 13  | 238  | 1244 | 38   | 1533   | 82.00% | 9.43  |
|                                  |                            | CR Cutoffs, Arm/Height     | 23.53 | 83.81 | 4.76  | 96.96 | 12  | 240  | 1242 | 39   | 1533   | 81.80% | 7.34  |
| HbA1C                            | BMI ≥ 85th Percentile      | 34.48                      | 69.64 | 2.29  | 98.09 | 10    | 426 | 977  | 19   | 1432 | 68.92% | 4.12   |       |
|                                  | CR Cutoffs, BMI Percentile | 24.14                      | 83.39 | 2.92  | 98.15 | 7     | 233 | 1170 | 22   | 1432 | 82.19% | 7.53   |       |
|                                  | CR Cutoffs, Arm/Height     | 24.14                      | 83.25 | 2.89  | 98.15 | 7     | 235 | 1168 | 22   | 1432 | 82.05% | 7.39   |       |
| FPG                              | BMI ≥ 85th Percentile      | 31.34                      | 73.69 | 11.54 | 90.74 | 21    | 161 | 451  | 46   | 679  | 69.51% | 5.04   |       |
|                                  | CR Cutoffs, BMI Percentile | 22.39                      | 85.29 | 14.29 | 90.94 | 15    | 90  | 522  | 52   | 679  | 79.09% | 7.68   |       |
|                                  | CR Cutoffs, Arm/Height     | 19.40                      | 85.13 | 12.50 | 90.61 | 13    | 91  | 521  | 54   | 679  | 78.65% | 4.53   |       |

Continued on the Next Page.

| Race                       | CR               | Predictor                  | Sensi                      | Speci | PPV   | NPV   | Tr+   | Fal+ | Tr-  | Fal- | Total | Accur  | J      |       |
|----------------------------|------------------|----------------------------|----------------------------|-------|-------|-------|-------|------|------|------|-------|--------|--------|-------|
| Non-Hispanic Black Females | Overall          | BMI ≥ 85th Percentile      | 53.09                      | 63.98 | 71.67 | 44.28 | 215   | 85   | 151  | 190  | 641   | 57.10% | 17.07  |       |
|                            |                  | CR Cutoffs, BMI Percentile | 34.07                      | 80.08 | 74.59 | 41.45 | 138   | 47   | 189  | 267  | 641   | 51.01% | 14.16  |       |
|                            |                  | CR Cutoffs, Arm/Height     | 35.80                      | 75.42 | 71.43 | 40.64 | 145   | 58   | 178  | 260  | 641   | 50.39% | 11.23  |       |
|                            | TC               | BMI ≥ 85th Percentile      | 45.18                      | 55.68 | 36.88 | 63.92 | 253   | 433  | 544  | 307  | 1537  | 51.85% | 0.86   |       |
|                            |                  | CR Cutoffs, BMI Percentile | 28.39                      | 72.47 | 37.15 | 63.84 | 159   | 269  | 708  | 401  | 1537  | 56.41% | 0.86   |       |
|                            |                  | CR Cutoffs, Arm/Height     | 25.54                      | 74.92 | 36.86 | 63.71 | 143   | 245  | 732  | 417  | 1537  | 56.93% | 0.46   |       |
|                            | LDL-C            | BMI ≥ 85th Percentile      | 51.68                      | 54.05 | 24.44 | 79.55 | 77    | 238  | 280  | 72   | 667   | 53.52% | 5.73   |       |
|                            |                  | CR Cutoffs, BMI Percentile | 29.53                      | 71.43 | 22.92 | 77.89 | 44    | 148  | 370  | 105  | 667   | 62.07% | 0.96   |       |
|                            |                  | CR Cutoffs, Arm/Height     | 26.17                      | 72.59 | 21.55 | 77.37 | 39    | 142  | 376  | 110  | 667   | 62.22% | -1.24  |       |
|                            | HDL-C            | BMI ≥ 85th Percentile      | 66.67                      | 61.96 | 34.40 | 86.13 | 236   | 450  | 733  | 118  | 1537  | 63.04% | 28.63  |       |
|                            |                  | CR Cutoffs, BMI Percentile | 49.44                      | 78.61 | 40.89 | 83.86 | 175   | 253  | 930  | 179  | 1537  | 71.89% | 28.05  |       |
|                            |                  | CR Cutoffs, Arm/Height     | 46.05                      | 80.98 | 42.01 | 83.38 | 163   | 225  | 958  | 191  | 1537  | 72.93% | 27.03  |       |
|                            | TG               | BMI ≥ 85th Percentile      | 69.16                      | 57.65 | 22.70 | 91.22 | 74    | 252  | 343  | 33   | 702   | 59.40% | 26.81  |       |
|                            |                  | CR Cutoffs, BMI Percentile | 50.47                      | 75.80 | 27.27 | 89.48 | 54    | 144  | 451  | 53   | 702   | 71.94% | 26.27  |       |
|                            |                  | CR Cutoffs, Arm/Height     | 46.73                      | 77.31 | 27.03 | 88.97 | 50    | 135  | 460  | 57   | 702   | 72.65% | 24.04  |       |
|                            | SBP              | BMI ≥ 85th Percentile      | 63.86                      | 58.32 | 17.36 | 92.17 | 129   | 614  | 859  | 73   | 1675  | 58.99% | 22.18  |       |
|                            |                  | CR Cutoffs, BMI Percentile | 47.52                      | 74.68 | 20.47 | 91.21 | 96    | 373  | 1100 | 106  | 1675  | 71.40% | 22.20  |       |
|                            |                  | CR Cutoffs, Arm/Height     | 41.58                      | 76.78 | 19.72 | 90.55 | 84    | 342  | 1131 | 118  | 1675  | 72.54% | 18.37  |       |
|                            | DBP              | BMI ≥ 85th Percentile      | 56.06                      | 56.23 | 5.00  | 96.89 | 37    | 703  | 903  | 29   | 1672  | 56.22% | 12.29  |       |
|                            |                  | CR Cutoffs, BMI Percentile | 31.82                      | 72.17 | 4.49  | 96.26 | 21    | 447  | 1159 | 45   | 1672  | 70.57% | 3.99   |       |
|                            |                  | CR Cutoffs, Arm/Height     | 31.82                      | 74.84 | 4.94  | 96.39 | 21    | 404  | 1202 | 45   | 1672  | 73.15% | 6.66   |       |
|                            | HbA1C            | BMI ≥ 85th Percentile      | 67.86                      | 57.54 | 10.94 | 95.89 | 76    | 619  | 839  | 36   | 1570  | 58.28% | 25.40  |       |
|                            |                  | CR Cutoffs, BMI Percentile | 50.00                      | 74.07 | 12.90 | 95.07 | 56    | 378  | 1080 | 56   | 1570  | 72.36% | 24.07  |       |
|                            |                  | CR Cutoffs, Arm/Height     | 45.54                      | 76.47 | 12.94 | 94.81 | 51    | 343  | 1115 | 61   | 1570  | 74.27% | 22.01  |       |
|                            | FPG              | BMI ≥ 85th Percentile      | 64.41                      | 55.62 | 11.52 | 94.57 | 38    | 292  | 366  | 21   | 717   | 56.35% | 20.03  |       |
|                            |                  | CR Cutoffs, BMI Percentile | 54.24                      | 74.62 | 16.08 | 94.79 | 32    | 167  | 491  | 27   | 717   | 72.94% | 28.86  |       |
|                            |                  | CR Cutoffs, Arm/Height     | 52.54                      | 76.44 | 16.67 | 94.73 | 31    | 155  | 503  | 28   | 717   | 74.48% | 28.99  |       |
|                            | Hispanic Females | Overall                    | BMI ≥ 85th Percentile      | 49.43 | 77.78 | 81.82 | 43.19 | 306  | 68   | 238  | 313   | 925    | 58.81% | 27.21 |
|                            |                  |                            | CR Cutoffs, BMI Percentile | 31.50 | 92.16 | 89.04 | 39.94 | 195  | 24   | 282  | 424   | 925    | 51.57% | 23.66 |
|                            |                  |                            | CR Cutoffs, Arm/Height     | 33.28 | 88.24 | 85.12 | 39.53 | 206  | 36   | 270  | 413   | 925    | 51.46% | 21.51 |
| TC                         |                  | BMI ≥ 85th Percentile      | 46.45                      | 63.60 | 38.77 | 70.54 | 321   | 507  | 886  | 370  | 2084  | 57.92% | 10.06  |       |
|                            |                  | CR Cutoffs, BMI Percentile | 29.52                      | 79.90 | 42.15 | 69.56 | 204   | 280  | 1113 | 487  | 2084  | 63.20% | 9.42   |       |
|                            |                  | CR Cutoffs, Arm/Height     | 27.06                      | 80.55 | 40.83 | 69.00 | 187   | 271  | 1122 | 504  | 2084  | 62.81% | 7.61   |       |
| LDL-C                      |                  | BMI ≥ 85th Percentile      | 50.00                      | 62.04 | 20.79 | 86.16 | 79    | 301  | 492  | 79   | 951   | 60.04% | 12.04  |       |
|                            |                  | CR Cutoffs, BMI Percentile | 34.18                      | 79.32 | 24.77 | 85.81 | 54    | 164  | 629  | 104  | 951   | 71.82% | 13.50  |       |
|                            |                  | CR Cutoffs, Arm/Height     | 29.75                      | 80.71 | 23.50 | 85.22 | 47    | 153  | 640  | 111  | 951   | 72.24% | 10.45  |       |
| HDL-C                      |                  | BMI ≥ 85th Percentile      | 59.91                      | 69.23 | 46.38 | 79.54 | 384   | 444  | 999  | 257  | 2084  | 66.36% | 29.14  |       |
|                            |                  | CR Cutoffs, BMI Percentile | 41.65                      | 84.96 | 55.17 | 76.63 | 267   | 217  | 1226 | 374  | 2084  | 71.64% | 26.62  |       |
|                            |                  | CR Cutoffs, Arm/Height     | 39.16                      | 85.65 | 54.80 | 76.01 | 251   | 207  | 1236 | 390  | 2084  | 71.35% | 24.81  |       |
| TG                         |                  | BMI ≥ 85th Percentile      | 56.30                      | 70.18 | 54.12 | 71.99 | 210   | 178  | 419  | 163  | 970   | 64.85% | 26.48  |       |
|                            |                  | CR Cutoffs, BMI Percentile | 37.27                      | 85.93 | 62.33 | 68.67 | 139   | 84   | 513  | 234  | 970   | 67.22% | 23.20  |       |
|                            |                  | CR Cutoffs, Arm/Height     | 33.24                      | 86.60 | 60.78 | 67.49 | 124   | 80   | 517  | 249  | 970   | 66.08% | 19.84  |       |
| SBP                        |                  | BMI ≥ 85th Percentile      | 75.80                      | 63.32 | 13.65 | 97.16 | 119   | 753  | 1300 | 38   | 2210  | 64.21% | 39.12  |       |
|                            |                  | CR Cutoffs, BMI Percentile | 53.50                      | 79.01 | 16.31 | 95.69 | 84    | 431  | 1622 | 73   | 2210  | 77.19% | 32.51  |       |
|                            |                  | CR Cutoffs, Arm/Height     | 55.41                      | 80.47 | 17.83 | 95.93 | 87    | 401  | 1652 | 70   | 2210  | 78.69% | 35.88  |       |
| DBP                        |                  | BMI ≥ 85th Percentile      | 44.44                      | 60.65 | 2.30  | 98.13 | 20    | 850  | 1310 | 25   | 2205  | 60.32% | 5.09   |       |
|                            |                  | CR Cutoffs, BMI Percentile | 33.33                      | 76.90 | 2.92  | 98.23 | 15    | 499  | 1661 | 30   | 2205  | 76.01% | 10.23  |       |
|                            |                  | CR Cutoffs, Arm/Height     | 31.11                      | 78.15 | 2.88  | 98.20 | 14    | 472  | 1688 | 31   | 2205  | 77.19% | 9.26   |       |
| HbA1C                      |                  | BMI ≥ 85th Percentile      | 70.00                      | 61.26 | 5.03  | 98.58 | 42    | 793  | 1254 | 18   | 2107  | 61.51% | 31.26  |       |
|                            |                  | CR Cutoffs, BMI Percentile | 51.67                      | 77.63 | 6.34  | 98.21 | 31    | 458  | 1589 | 29   | 2107  | 76.89% | 29.29  |       |
|                            |                  | CR Cutoffs, Arm/Height     | 55.00                      | 79.04 | 7.14  | 98.36 | 33    | 429  | 1618 | 27   | 2107  | 78.36% | 34.04  |       |
| FPG                        |                  | BMI ≥ 85th Percentile      | 52.17                      | 61.98 | 15.38 | 90.73 | 60    | 330  | 538  | 55   | 983   | 60.83% | 14.16  |       |
|                            |                  | CR Cutoffs, BMI Percentile | 33.91                      | 78.69 | 17.41 | 89.99 | 39    | 185  | 683  | 76   | 983   | 73.45% | 12.60  |       |
|                            |                  | CR Cutoffs, Arm/Height     | 31.30                      | 80.53 | 17.56 | 89.85 | 36    | 169  | 699  | 79   | 983   | 74.77% | 11.83  |       |

CR = cardiometabolic risk; Overall = unhealthy level on any CR variable; TC = total cholesterol; LDL-C = low-density lipoprotein cholesterol; HDL-C = high-density lipoprotein cholesterol; TG = triglycerides; SBP = systolic blood pressure; DBP = diastolic blood pressure; HbA1c = glycated hemoglobin; FPG = fasting plasma glucose. Unhealthy level of each CR variable includes both borderline-risk and high-risk levels, defined according to National Heart, Lung and Blood Institute Expert Panel Report 2012, American Academy of Pediatrics, and American Diabetes Association.

Sensi = sensitivity; Speci = specificity; PPV = positive predictive value; NPV = negative predictive value; Tr+ = true positives; Fal+ = false positives; Tr- = true negatives; Fal- = false negatives; Accur = Accuracy (i.e., % correctly classified); J = sensitivity + specificity - 100 (i.e., Youden's Index)

Conventionally, BMI ≥ 85<sup>th</sup> percentile (overweight) was considered high-risk. For CR, BMI ≥ 94<sup>th</sup> percentile and arm/height ≥ 0.19, were considered high-risk.

**Appendix-2: Statistical Measures for Classification of Each Binary Cardiometabolic Risk Variable, Using Each Binary**

**Measure of General Obesity, Reference Table for Males of Ages 12-18 by Race and Ethnicity, N=6,289**

| Race                           | CR                         | Predictor                  | Sensi | Speci | PPV   | NPV   | Tr+  | Fal+ | Tr-  | Fal- | Total | Accur | J     |
|--------------------------------|----------------------------|----------------------------|-------|-------|-------|-------|------|------|------|------|-------|-------|-------|
| Males of All Races/Ethnicities | TC                         | BMI ≥ 85th Percentile      | 48.79 | 67.57 | 39.53 | 75.23 | 850  | 1300 | 2709 | 892  | 5751  | 0.62  | 16.37 |
|                                |                            | CR Cutoffs, BMI Percentile | 66.59 | 46.17 | 34.96 | 76.08 | 1160 | 2158 | 1851 | 582  | 5751  | 0.52  | 12.76 |
|                                |                            | CR Cutoffs, Arm/Height     | 60.96 | 54.38 | 36.73 | 76.22 | 1062 | 1829 | 2180 | 680  | 5751  | 0.56  | 15.34 |
|                                | LDL-C                      | BMI ≥ 85th Percentile      | 54.22 | 68.45 | 29.52 | 85.99 | 289  | 690  | 1497 | 244  | 2720  | 0.66  | 22.67 |
|                                |                            | CR Cutoffs, BMI Percentile | 69.79 | 46.87 | 24.25 | 86.42 | 372  | 1162 | 1025 | 161  | 2720  | 0.51  | 16.66 |
|                                |                            | CR Cutoffs, Arm/Height     | 66.42 | 54.14 | 26.09 | 86.87 | 354  | 1003 | 1184 | 179  | 2720  | 0.57  | 20.55 |
|                                | HDL-C                      | BMI ≥ 85th Percentile      | 54.40 | 73.90 | 58.05 | 70.94 | 1248 | 902  | 2554 | 1046 | 5750  | 0.66  | 28.30 |
|                                |                            | CR Cutoffs, BMI Percentile | 72.62 | 52.23 | 50.23 | 74.19 | 1666 | 1651 | 1805 | 628  | 5750  | 0.60  | 24.85 |
|                                |                            | CR Cutoffs, Arm/Height     | 66.48 | 60.47 | 52.75 | 73.10 | 1525 | 1366 | 2090 | 769  | 5750  | 0.63  | 26.95 |
|                                | TG                         | BMI ≥ 85th Percentile      | 54.58 | 72.63 | 48.77 | 77.01 | 495  | 520  | 1380 | 412  | 2807  | 0.67  | 27.21 |
|                                |                            | CR Cutoffs, BMI Percentile | 72.11 | 51.16 | 41.34 | 79.35 | 654  | 928  | 972  | 253  | 2807  | 0.58  | 23.26 |
|                                |                            | CR Cutoffs, Arm/Height     | 66.92 | 58.05 | 43.23 | 78.62 | 607  | 797  | 1103 | 300  | 2807  | 0.61  | 24.98 |
|                                | SBP                        | BMI ≥ 85th Percentile      | 55.92 | 68.27 | 32.72 | 84.88 | 741  | 1524 | 3279 | 584  | 6128  | 0.66  | 24.19 |
|                                |                            | CR Cutoffs, BMI Percentile | 74.79 | 47.51 | 28.22 | 87.23 | 991  | 2521 | 2282 | 334  | 6128  | 0.53  | 22.30 |
|                                |                            | CR Cutoffs, Arm/Height     | 68.68 | 55.57 | 29.89 | 86.54 | 910  | 2134 | 2669 | 415  | 6128  | 0.58  | 24.25 |
|                                | DBP                        | BMI ≥ 85th Percentile      | 36.32 | 63.16 | 3.62  | 96.30 | 81   | 2158 | 3699 | 142  | 6080  | 0.62  | -0.52 |
|                                |                            | CR Cutoffs, BMI Percentile | 55.16 | 42.77 | 3.54  | 96.16 | 123  | 3352 | 2505 | 100  | 6080  | 0.43  | -2.07 |
|                                |                            | CR Cutoffs, Arm/Height     | 52.47 | 50.54 | 3.88  | 96.54 | 117  | 2897 | 2960 | 106  | 6080  | 0.51  | 3.00  |
|                                | HbA1C                      | BMI ≥ 85th Percentile      | 44.76 | 63.19 | 8.06  | 94.07 | 175  | 1996 | 3427 | 216  | 5814  | 0.62  | 7.95  |
|                                |                            | CR Cutoffs, BMI Percentile | 63.68 | 42.80 | 7.43  | 94.23 | 249  | 3102 | 2321 | 142  | 5814  | 0.44  | 6.48  |
|                                |                            | CR Cutoffs, Arm/Height     | 56.01 | 50.23 | 7.51  | 94.06 | 219  | 2699 | 2724 | 172  | 5814  | 0.51  | 6.24  |
|                                | FPG                        | BMI ≥ 85th Percentile      | 44.80 | 66.24 | 27.29 | 80.93 | 280  | 746  | 1464 | 345  | 2835  | 0.62  | 11.04 |
|                                |                            | CR Cutoffs, BMI Percentile | 65.60 | 46.38 | 25.71 | 82.66 | 410  | 1185 | 1025 | 215  | 2835  | 0.51  | 11.98 |
|                                |                            | CR Cutoffs, Arm/Height     | 56.96 | 52.08 | 25.16 | 81.06 | 356  | 1059 | 1151 | 269  | 2835  | 0.53  | 9.04  |
| Non-Hispanic White Males       | Overall                    | BMI ≥ 85th Percentile      | 38.32 | 84.97 | 88.74 | 30.82 | 205  | 26   | 147  | 330  | 708   | 0.50  | 23.29 |
|                                |                            | CR Cutoffs, BMI Percentile | 66.54 | 54.91 | 82.03 | 34.67 | 356  | 78   | 95   | 179  | 708   | 0.64  | 21.46 |
|                                |                            | CR Cutoffs, Arm/Height     | 65.05 | 60.12 | 83.45 | 35.74 | 348  | 69   | 104  | 187  | 708   | 0.64  | 25.16 |
|                                | TC                         | BMI ≥ 85th Percentile      | 47.65 | 71.56 | 39.11 | 78.09 | 203  | 316  | 795  | 223  | 1537  | 0.65  | 19.21 |
|                                |                            | CR Cutoffs, BMI Percentile | 67.37 | 50.05 | 34.09 | 80.00 | 287  | 555  | 556  | 139  | 1537  | 0.55  | 17.42 |
|                                |                            | CR Cutoffs, Arm/Height     | 61.97 | 58.15 | 36.21 | 79.95 | 264  | 465  | 646  | 162  | 1537  | 0.59  | 20.12 |
|                                | LDL-C                      | BMI ≥ 85th Percentile      | 49.64 | 71.94 | 29.49 | 85.80 | 69   | 165  | 423  | 70   | 727   | 0.68  | 21.58 |
|                                |                            | CR Cutoffs, BMI Percentile | 67.63 | 51.70 | 24.87 | 87.11 | 94   | 284  | 304  | 45   | 727   | 0.55  | 19.33 |
|                                |                            | CR Cutoffs, Arm/Height     | 66.19 | 56.63 | 26.51 | 87.63 | 92   | 255  | 333  | 47   | 727   | 0.58  | 22.82 |
|                                | HDL-C                      | BMI ≥ 85th Percentile      | 48.17 | 78.67 | 66.09 | 63.75 | 343  | 176  | 649  | 369  | 1537  | 0.65  | 26.84 |
|                                |                            | CR Cutoffs, BMI Percentile | 66.99 | 55.76 | 56.65 | 66.19 | 477  | 365  | 460  | 235  | 1537  | 0.61  | 22.75 |
|                                |                            | CR Cutoffs, Arm/Height     | 60.81 | 64.12 | 59.40 | 65.47 | 433  | 296  | 529  | 279  | 1537  | 0.63  | 24.94 |
|                                | TG                         | BMI ≥ 85th Percentile      | 45.79 | 76.68 | 56.67 | 67.99 | 136  | 104  | 342  | 161  | 743   | 0.64  | 22.47 |
|                                |                            | CR Cutoffs, BMI Percentile | 67.34 | 58.07 | 51.68 | 72.75 | 200  | 187  | 259  | 97   | 743   | 0.62  | 25.41 |
|                                |                            | CR Cutoffs, Arm/Height     | 61.62 | 61.43 | 51.55 | 70.62 | 183  | 172  | 274  | 114  | 743   | 0.62  | 23.05 |
|                                | SBP                        | BMI ≥ 85th Percentile      | 53.80 | 71.45 | 30.80 | 86.75 | 170  | 382  | 956  | 146  | 1654  | 0.68  | 25.25 |
|                                |                            | CR Cutoffs, BMI Percentile | 70.57 | 49.63 | 24.86 | 87.71 | 223  | 674  | 664  | 93   | 1654  | 0.54  | 20.20 |
|                                |                            | CR Cutoffs, Arm/Height     | 67.09 | 58.30 | 27.53 | 88.24 | 212  | 558  | 780  | 104  | 1654  | 0.60  | 25.38 |
|                                | DBP                        | BMI ≥ 85th Percentile      | 46.03 | 67.24 | 5.30  | 96.90 | 29   | 518  | 1063 | 34   | 1644  | 0.66  | 13.27 |
|                                |                            | CR Cutoffs, BMI Percentile | 58.73 | 46.11 | 4.16  | 96.56 | 37   | 852  | 729  | 26   | 1644  | 0.47  | 4.84  |
|                                |                            | CR Cutoffs, Arm/Height     | 65.08 | 54.21 | 5.36  | 97.50 | 41   | 724  | 857  | 22   | 1644  | 0.55  | 19.29 |
|                                | HbA1C                      | BMI ≥ 85th Percentile      | 47.37 | 66.58 | 3.43  | 98.06 | 18   | 507  | 1010 | 20   | 1555  | 0.66  | 13.95 |
|                                |                            | CR Cutoffs, BMI Percentile | 63.16 | 45.42 | 2.82  | 98.01 | 24   | 828  | 689  | 14   | 1555  | 0.46  | 8.58  |
|                                |                            | CR Cutoffs, Arm/Height     | 55.26 | 52.87 | 2.85  | 97.92 | 21   | 715  | 802  | 17   | 1555  | 0.53  | 8.13  |
| FPG                            | BMI ≥ 85th Percentile      | 36.75                      | 69.01 | 25.21 | 79.33 | 61    | 181  | 403  | 105  | 750  | 0.62  | 5.75  |       |
|                                | CR Cutoffs, BMI Percentile | 59.64                      | 50.34 | 25.45 | 81.44 | 99    | 290  | 294  | 67   | 750  | 0.52  | 9.98  |       |
|                                | CR Cutoffs, Arm/Height     | 50.60                      | 53.42 | 23.60 | 79.19 | 84    | 272  | 312  | 82   | 750  | 0.53  | 4.03  |       |

Continued on the Next Page.

| Race                     | CR             | Predictor                  | Sensi                      | Speci | PPV   | NPV   | Tr+   | Fal+ | Tr-  | Fal- | Total | Accur | J     |       |
|--------------------------|----------------|----------------------------|----------------------------|-------|-------|-------|-------|------|------|------|-------|-------|-------|-------|
| Non-Hispanic Black Males | Overall        | BMI ≥ 85th Percentile      | 39.31                      | 78.85 | 82.61 | 33.71 | 228   | 48   | 179  | 352  | 807   | 0.50  | 18.16 |       |
|                          |                | CR Cutoffs, BMI Percentile | 68.45                      | 44.05 | 75.76 | 35.34 | 397   | 127  | 100  | 183  | 807   | 0.62  | 12.50 |       |
|                          |                | CR Cutoffs, Arm/Height     | 69.83                      | 50.22 | 78.19 | 39.45 | 405   | 113  | 114  | 175  | 807   | 0.64  | 20.05 |       |
|                          | TC             | BMI ≥ 85th Percentile      | 43.15                      | 68.78 | 41.29 | 70.40 | 249   | 354  | 780  | 328  | 1711  | 0.60  | 11.94 |       |
|                          |                | CR Cutoffs, BMI Percentile | 60.49                      | 45.41 | 36.05 | 69.31 | 349   | 619  | 515  | 228  | 1711  | 0.50  | 5.90  |       |
|                          |                | CR Cutoffs, Arm/Height     | 53.38                      | 55.20 | 37.75 | 69.94 | 308   | 508  | 626  | 269  | 1711  | 0.55  | 8.58  |       |
|                          | LDL-C          | BMI ≥ 85th Percentile      | 51.37                      | 69.74 | 31.97 | 83.82 | 94    | 200  | 461  | 89   | 844   | 0.66  | 21.11 |       |
|                          |                | CR Cutoffs, BMI Percentile | 64.48                      | 45.39 | 24.63 | 82.19 | 118   | 361  | 300  | 65   | 844   | 0.50  | 9.87  |       |
|                          |                | CR Cutoffs, Arm/Height     | 60.11                      | 54.77 | 26.89 | 83.22 | 110   | 299  | 362  | 73   | 844   | 0.56  | 14.87 |       |
|                          | HDL-C          | BMI ≥ 85th Percentile      | 56.90                      | 73.13 | 45.11 | 81.39 | 272   | 331  | 901  | 206  | 1710  | 0.69  | 30.04 |       |
|                          |                | CR Cutoffs, BMI Percentile | 73.01                      | 49.84 | 36.09 | 82.64 | 349   | 618  | 614  | 129  | 1710  | 0.56  | 22.85 |       |
|                          |                | CR Cutoffs, Arm/Height     | 66.74                      | 59.66 | 39.09 | 82.21 | 319   | 497  | 735  | 159  | 1710  | 0.62  | 26.40 |       |
|                          | TG             | BMI ≥ 85th Percentile      | 53.37                      | 69.18 | 28.25 | 86.71 | 87    | 221  | 496  | 76   | 880   | 0.66  | 22.55 |       |
|                          |                | CR Cutoffs, BMI Percentile | 68.10                      | 46.16 | 22.33 | 86.42 | 111   | 386  | 331  | 52   | 880   | 0.50  | 14.26 |       |
|                          |                | CR Cutoffs, Arm/Height     | 65.64                      | 55.79 | 25.24 | 87.72 | 107   | 317  | 400  | 56   | 880   | 0.58  | 21.43 |       |
|                          | SBP            | BMI ≥ 85th Percentile      | 51.42                      | 71.90 | 37.88 | 81.62 | 236   | 387  | 990  | 223  | 1836  | 0.67  | 23.31 |       |
|                          |                | CR Cutoffs, BMI Percentile | 73.64                      | 50.76 | 33.27 | 85.24 | 338   | 678  | 699  | 121  | 1836  | 0.56  | 24.40 |       |
|                          |                | CR Cutoffs, Arm/Height     | 64.49                      | 59.91 | 34.91 | 83.50 | 296   | 552  | 825  | 163  | 1836  | 0.61  | 24.40 |       |
|                          | DBP            | BMI ≥ 85th Percentile      | 27.27                      | 65.92 | 3.41  | 95.35 | 21    | 594  | 1149 | 56   | 1820  | 0.64  | -6.81 |       |
|                          |                | CR Cutoffs, BMI Percentile | 48.05                      | 44.52 | 3.69  | 95.10 | 37    | 967  | 776  | 40   | 1820  | 0.45  | -7.43 |       |
|                          |                | CR Cutoffs, Arm/Height     | 44.16                      | 53.93 | 4.06  | 95.63 | 34    | 803  | 940  | 43   | 1820  | 0.54  | -1.91 |       |
|                          | HbA1C          | BMI ≥ 85th Percentile      | 43.17                      | 66.25 | 16.17 | 88.54 | 98    | 508  | 997  | 129  | 1732  | 0.63  | 9.42  |       |
|                          |                | CR Cutoffs, BMI Percentile | 61.23                      | 44.52 | 14.27 | 88.39 | 139   | 835  | 670  | 88   | 1732  | 0.47  | 5.75  |       |
|                          |                | CR Cutoffs, Arm/Height     | 51.54                      | 53.22 | 14.25 | 87.93 | 117   | 704  | 801  | 110  | 1732  | 0.53  | 4.76  |       |
|                          | FPG            | BMI ≥ 85th Percentile      | 45.97                      | 67.28 | 18.51 | 88.51 | 57    | 251  | 516  | 67   | 891   | 0.64  | 13.24 |       |
|                          |                | CR Cutoffs, BMI Percentile | 67.74                      | 45.89 | 16.83 | 89.80 | 84    | 415  | 352  | 40   | 891   | 0.49  | 13.64 |       |
|                          |                | CR Cutoffs, Arm/Height     | 59.68                      | 54.24 | 17.41 | 89.27 | 74    | 351  | 416  | 50   | 891   | 0.55  | 13.91 |       |
|                          | Hispanic Males | Overall                    | BMI ≥ 85th Percentile      | 46.80 | 80.49 | 89.58 | 29.68 | 344  | 40   | 165  | 391   | 940   | 0.54  | 27.29 |
|                          |                |                            | CR Cutoffs, BMI Percentile | 73.88 | 48.29 | 83.67 | 34.02 | 543  | 106  | 99   | 192   | 940   | 0.68  | 22.17 |
|                          |                |                            | CR Cutoffs, Arm/Height     | 73.20 | 51.22 | 84.33 | 34.77 | 538  | 100  | 105  | 197   | 940   | 0.68  | 24.42 |
| TC                       |                | BMI ≥ 85th Percentile      | 54.60                      | 62.95 | 38.26 | 76.73 | 344   | 555  | 943  | 286  | 2128  | 0.60  | 17.55 |       |
|                          |                | CR Cutoffs, BMI Percentile | 72.38                      | 42.32 | 34.55 | 78.47 | 456   | 864  | 634  | 174  | 2128  | 0.51  | 14.70 |       |
|                          |                | CR Cutoffs, Arm/Height     | 67.30                      | 49.60 | 35.96 | 78.29 | 424   | 755  | 743  | 206  | 2128  | 0.55  | 16.90 |       |
| LDL-C                    |                | BMI ≥ 85th Percentile      | 61.14                      | 63.80 | 27.23 | 88.11 | 107   | 286  | 504  | 68   | 965   | 0.63  | 24.94 |       |
|                          |                | CR Cutoffs, BMI Percentile | 77.71                      | 42.15 | 22.93 | 89.52 | 136   | 457  | 333  | 39   | 965   | 0.49  | 19.87 |       |
|                          |                | CR Cutoffs, Arm/Height     | 74.29                      | 49.75 | 24.67 | 89.73 | 130   | 397  | 393  | 45   | 965   | 0.54  | 24.03 |       |
| HDL-C                    |                | BMI ≥ 85th Percentile      | 57.65                      | 70.91 | 62.85 | 66.23 | 565   | 334  | 814  | 415  | 2128  | 0.65  | 28.56 |       |
|                          |                | CR Cutoffs, BMI Percentile | 76.94                      | 50.70 | 57.12 | 72.03 | 754   | 566  | 582  | 226  | 2128  | 0.63  | 27.64 |       |
|                          |                | CR Cutoffs, Arm/Height     | 70.71                      | 57.67 | 58.78 | 69.76 | 693   | 486  | 662  | 287  | 2128  | 0.64  | 28.38 |       |
| TG                       |                | BMI ≥ 85th Percentile      | 61.71                      | 73.12 | 60.34 | 74.24 | 245   | 161  | 438  | 152  | 996   | 0.69  | 34.83 |       |
|                          |                | CR Cutoffs, BMI Percentile | 78.09                      | 49.75 | 50.74 | 77.40 | 310   | 301  | 298  | 87   | 996   | 0.61  | 27.84 |       |
|                          |                | CR Cutoffs, Arm/Height     | 72.04                      | 56.26 | 52.19 | 75.22 | 286   | 262  | 337  | 111  | 996   | 0.63  | 28.30 |       |
| SBP                      |                | BMI ≥ 85th Percentile      | 60.50                      | 62.42 | 30.35 | 85.38 | 288   | 661  | 1098 | 188  | 2235  | 0.62  | 22.93 |       |
|                          |                | CR Cutoffs, BMI Percentile | 78.15                      | 41.96 | 26.70 | 87.65 | 372   | 1021 | 738  | 104  | 2235  | 0.50  | 20.11 |       |
|                          |                | CR Cutoffs, Arm/Height     | 73.95                      | 49.29 | 28.30 | 87.49 | 352   | 892  | 867  | 124  | 2235  | 0.55  | 23.24 |       |
| DBP                      |                | BMI ≥ 85th Percentile      | 37.88                      | 57.64 | 2.67  | 96.80 | 25    | 912  | 1241 | 41   | 2219  | 0.57  | -4.48 |       |
|                          |                | CR Cutoffs, BMI Percentile | 65.15                      | 37.95 | 3.12  | 97.26 | 43    | 1336 | 817  | 23   | 2219  | 0.39  | 3.10  |       |
|                          |                | CR Cutoffs, Arm/Height     | 54.55                      | 44.50 | 2.92  | 96.96 | 36    | 1195 | 958  | 30   | 2219  | 0.45  | -0.96 |       |
| HbA1C                    |                | BMI ≥ 85th Percentile      | 48.91                      | 57.98 | 4.95  | 96.21 | 45    | 864  | 1192 | 47   | 2148  | 0.58  | 6.89  |       |
|                          |                | CR Cutoffs, BMI Percentile | 68.48                      | 38.23 | 4.73  | 96.44 | 63    | 1270 | 786  | 29   | 2148  | 0.40  | 6.71  |       |
|                          |                | CR Cutoffs, Arm/Height     | 66.30                      | 45.04 | 5.12  | 96.76 | 61    | 1130 | 926  | 31   | 2148  | 0.46  | 11.34 |       |
| FPG                      |                | BMI ≥ 85th Percentile      | 49.13                      | 62.01 | 34.14 | 75.25 | 141   | 272  | 444  | 146  | 1003  | 0.58  | 11.14 |       |
|                          |                | CR Cutoffs, BMI Percentile | 69.34                      | 41.48 | 32.20 | 77.14 | 199   | 419  | 297  | 88   | 1003  | 0.49  | 10.82 |       |
|                          |                | CR Cutoffs, Arm/Height     | 60.98                      | 46.93 | 31.53 | 75.00 | 175   | 380  | 336  | 112  | 1003  | 0.51  | 7.90  |       |

CR = cardiometabolic risk; Overall = unhealthy level on any CR variable; TC = total cholesterol; LDL-C = low-density lipoprotein cholesterol; HDL-C = high-density lipoprotein cholesterol; TG = triglycerides; SBP = systolic blood pressure; DBP = diastolic blood pressure; HbA1c = glycated hemoglobin; FPG = fasting plasma glucose. Unhealthy level of each CR variable includes both borderline-risk and high-risk levels, defined according to National Heart, Lung and Blood Institute Expert Panel Report 2012, American Academy of Pediatrics, and American Diabetes Association.

Sensi = sensitivity; Speci = specificity; PPV = positive predictive value; NPV = negative predictive value; Tr+ = true positives; Fal+ = false positives; Tr- = true negatives; Fal- = false negatives; Accur = Accuracy (i.e., % correctly classified); J = sensitivity + specificity - 100 (i.e., Youden's Index)

Conventionally, BMI ≥ 85<sup>th</sup> percentile (overweight) was considered high-risk. For CR, BMI ≥ 64<sup>th</sup> percentile and arm/height ≥ 0.16, were considered high-risk.
